# Supplementary material for: Identification of Novel Ribonucleotide Reductase Inhibitors for Therapeutic Application in Bile Tract Cancer: An Advanced Pharmacoinformatics Study
Source: MDPI journal article supplement (doi:10.3390/biom12091279), 2022-09-10
Supplement: s1 [file s1]

# Identification of novel ribonucleotide reductase inhibitors for therapeutic application in Bile tract cancer: An advanced pharmacoinformatics study

Md Ataul Islam, Mayuri Makarand Barshetty, Sridhar Srinivasan, Dawood Babu Dudekula, V. P. Subramanyam Rallaband, Sameer Mohammed, Sathishkumar Natarajan, Junhyung Park

## Supplementary information

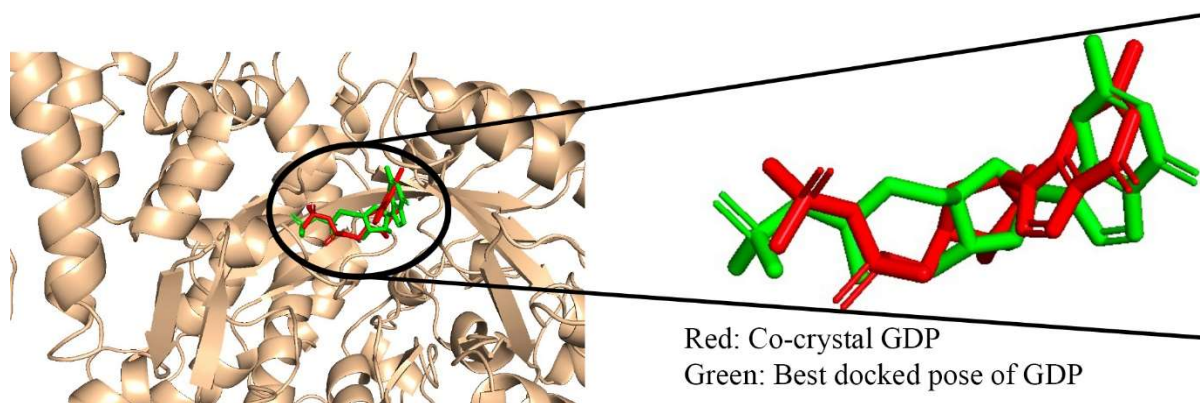

**Figure S1.** Superimposed structure of co-crystal and best docked pose of GDP. The RMSD was calculated 1.235 Å

Table S1. Number of pharmacophoric features in hRRM1 molecules calculated using Python RDKit

| Molecules   | <sup>1</sup> HBD | <sup>2</sup> HBA | <sup>3</sup> HY | <sup>4</sup> RA |
|-------------|------------------|------------------|-----------------|-----------------|
| Gemcitabine | 3                | 5                | 0               | 1               |
| NSAH        | 3                | 3                | 4               | 3               |
| BD_1        | 2                | 4                | 4               | 1               |
| BD_2        | 2                | 3                | 3               | 2               |
| BD_3        | 3                | 2                | 4               | 1               |
| BD_4        | 3                | 5                | 4               | 2               |
| BD_5        | 2                | 7                | 4               | 2               |
| BD_6        | 2                | 5                | 4               | 1               |
| BD_7        | 3                | 5                | 5               | 1               |
| BD_8        | 2                | 5                | 5               | 2               |
| BD_9        | 4                | 4                | 5               | 1               |
| BD_10       | 3                | 3                | 6               | 1               |
| BD_11       | 3                | 4                | 5               | 1               |

|       |   |   |   |   |
|-------|---|---|---|---|
| BD_12 | 4 | 3 | 6 | 2 |
| BD_13 | 3 | 6 | 3 | 1 |
| BD_14 | 4 | 4 | 5 | 1 |
| BD_15 | 3 | 4 | 5 | 2 |
| BD_16 | 3 | 5 | 5 | 2 |
| BD_17 | 3 | 4 | 5 | 1 |

<sup>1</sup>HB donor; <sup>2</sup>HB acceptor; <sup>3</sup>Hydrophobic; <sup>4</sup>Ring aromatic

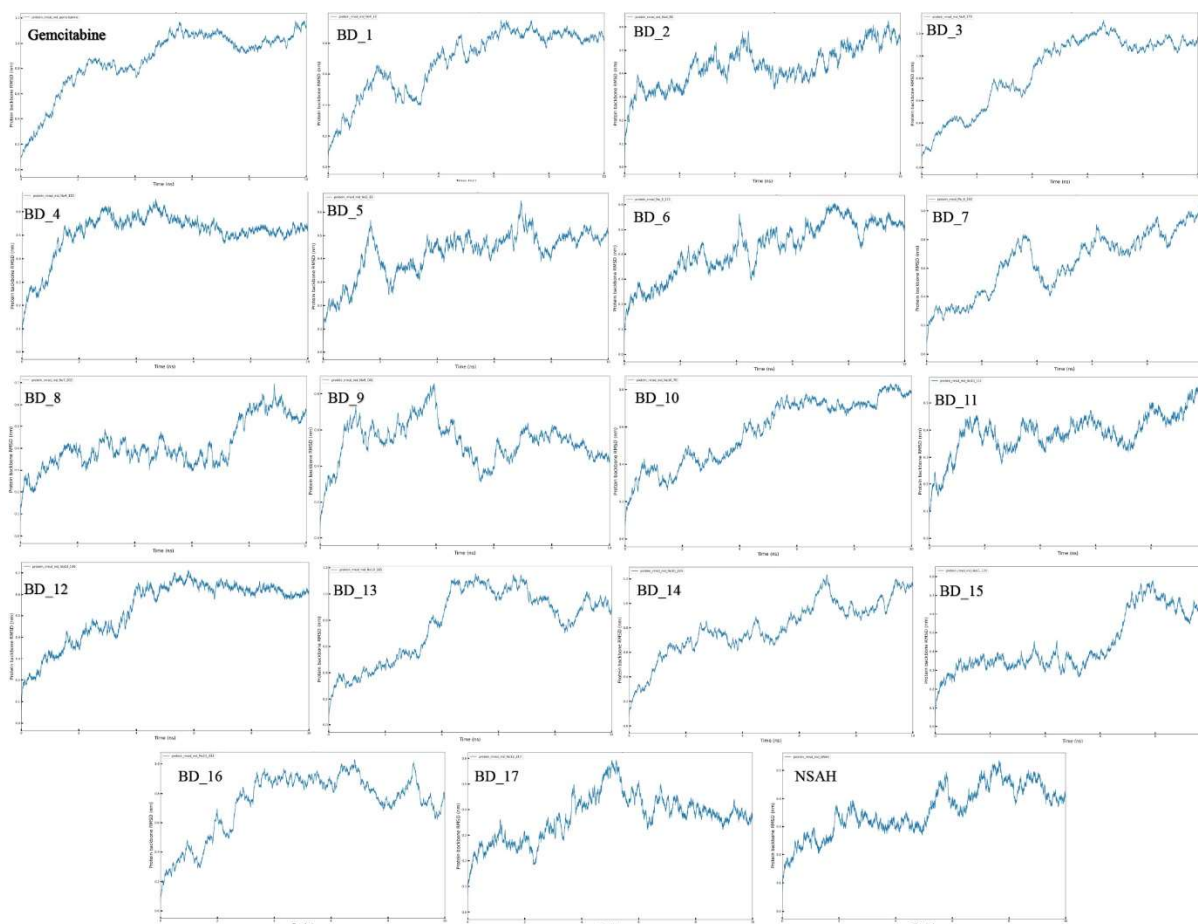

**Figure S2.** hRRM1 backbone RMSD bound with proposed molecules, and, Gemcitabine and NSAH

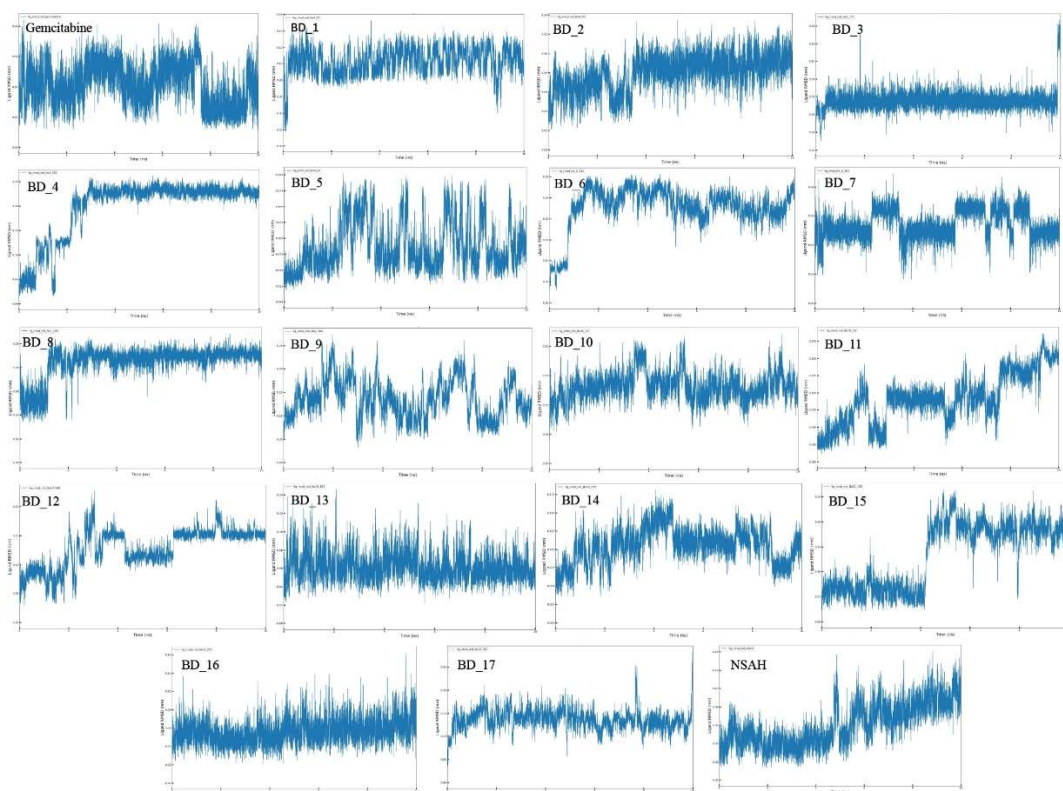

**Figure S3.** RMSD of hRRM1 proposed molecules, and, Gemcitabine and NSAH

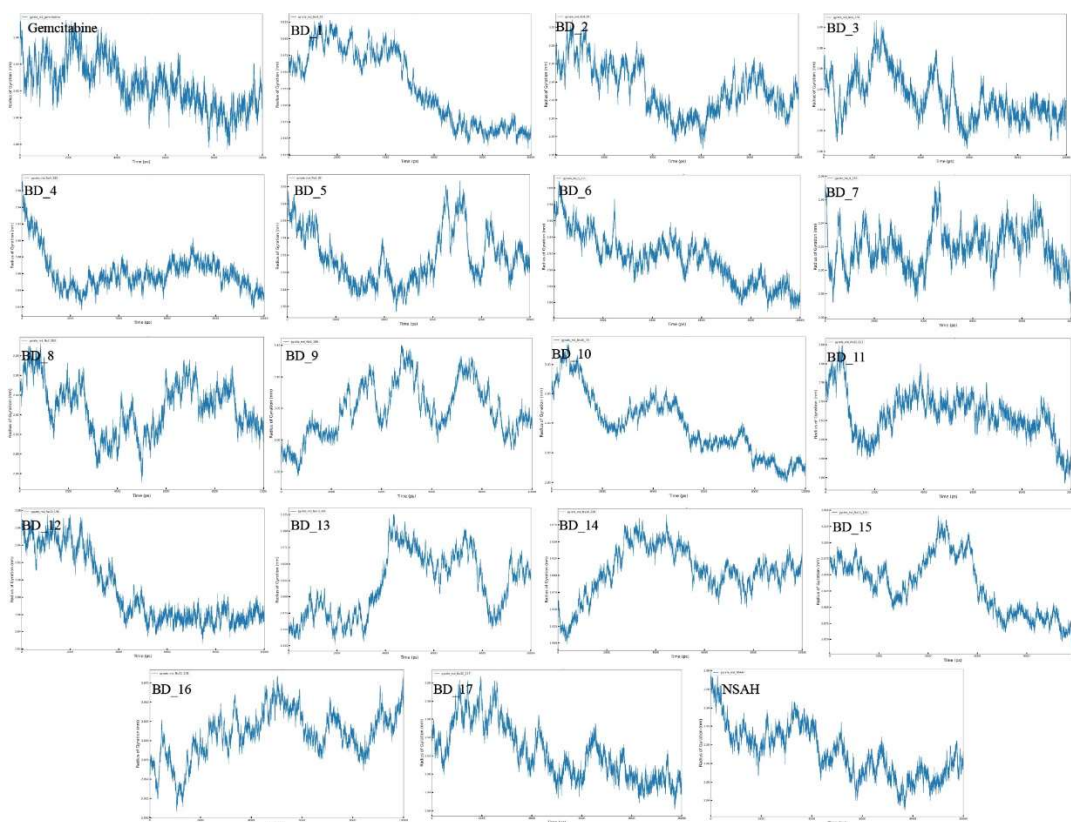

**Figure S4.** The radius of gyration of hRRM1 bound with proposed molecules, and, Gemcitabine and NSAH

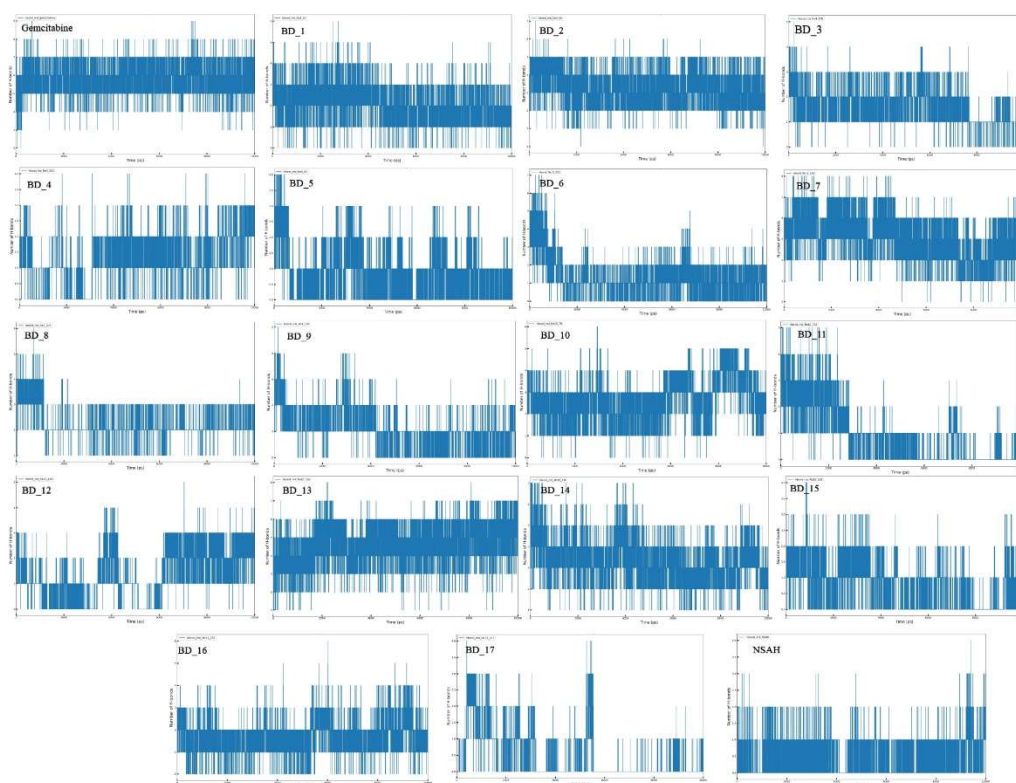

**Figure S5.** Intermolecular hydrogen bonds between hRRM1 and proposed molecules, and, Gemcitabine and NSAH
